# Supplementary material for: Precise nanofiltration in a fouling-resistant self-assembled membrane with water-continuous transport pathways
Source: PubMed Central journal article supplement (PMC6688870; doi:10.1126/sciadv.aav9308), 2019-08-09
Supplement: aav9308_SM.pdf [file aav9308_SM.pdf]

## Supplementary Materials for

### **Precise nanofiltration in a fouling-resistant self-assembled membrane with water-continuous transport pathways**

Xunda Feng, Qaboos Imran, Yizhou Zhang, Lucas Sixdenier, Xinglin Lu, Gilad Kaufman, Uri Gabinet, Kohsuke Kawabata, Menachem Elimelech, Chinedum O. Osuji\*

\*Corresponding author. Email: [cosuji@seas.upenn.edu](mailto:cosuji@seas.upenn.edu)

Published 9 August 2019, *Sci. Adv.* **5**, eaav9308 (2019)  
DOI: 10.1126/sciadv.aav9308

#### **This PDF file includes:**

- Fig. S1. METDAB/water binary phase diagram as determined by POM and x-ray scattering.
- Fig. S2. Polymerization of H<sub>1</sub> mesophases formed by METDAB/water binary systems in the absence of cross-linkers.
- Fig. S3. Structural characterization of an H<sub>1</sub> mesophase containing only one cross-linking species in the hydrophobic core of cylindrical micelles before and after UV-initiated cross-linking.
- Fig. S4. X-ray scattering and POM data showing slight structural changes in the H<sub>1</sub> gel, the cross-linked H<sub>1</sub> mesophase, and the swelled polymer.
- Fig. S5. Schematic illustration for the preparation of TEM samples.
- Fig. S6. Schematic illustration of the pore dimensions.
- Fig. S7. SEM images showing the cross sections of the H<sub>1</sub>/PAN composite membranes.
- Fig. S8. Photos showing the stirred cell used for the nanofiltration test.
- Fig. S9. The time-dependent solute rejection for H<sub>1</sub> composites and the static solute adsorption experiment for free-standing H<sub>1</sub> membranes.
- Fig. S10. UV-Vis spectrum and photographs demonstrating the competitive solute separation of CV and VB2.
- Section S1. Calculation of the pore dimensions in an H<sub>1</sub> membrane

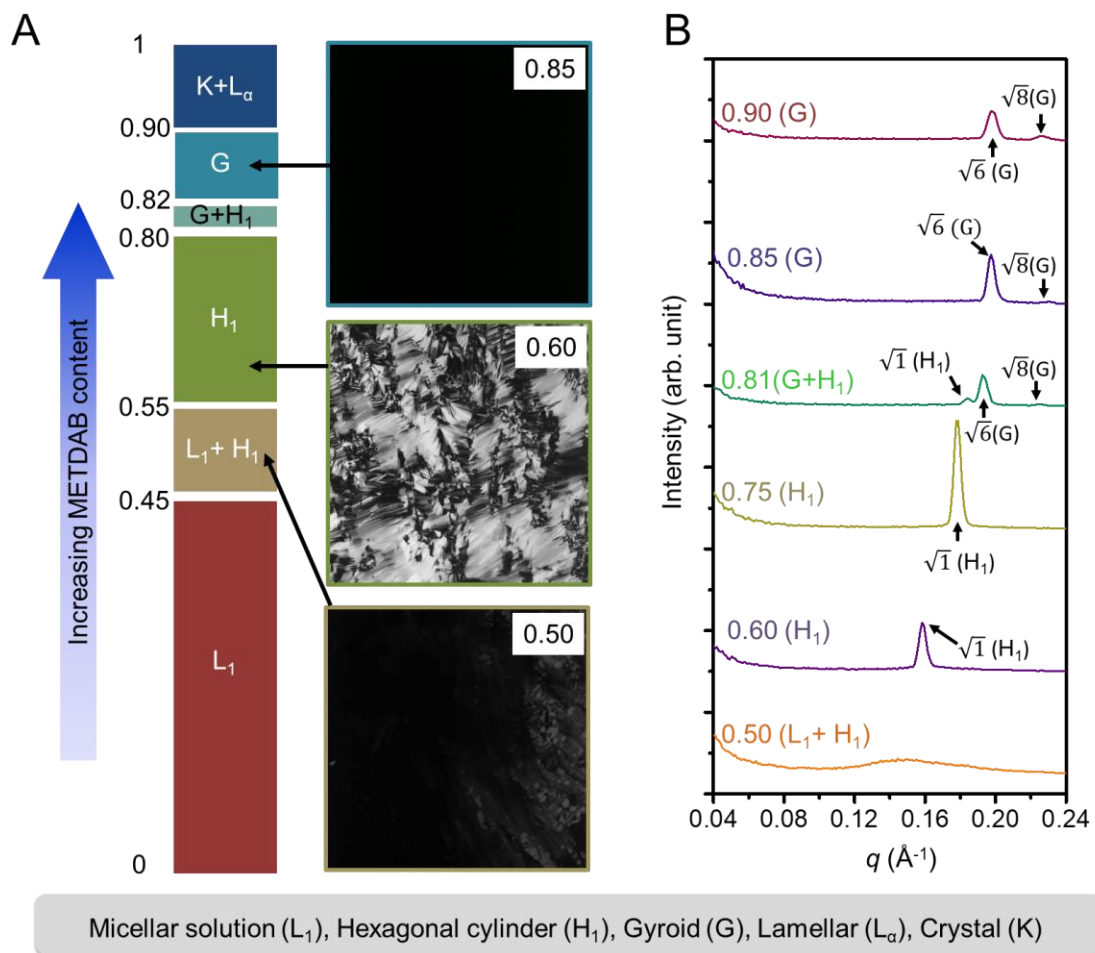

**Fig. S1. METDAB/water binary phase diagram as determined by POM and x-ray scattering.** The weight concentrations of METDAB are shown in the phase diagram. As the concentration of METDAB was increased, the surfactant/water mixtures followed a phase sequence of micellar solution ( $L_1$ ), hexagonal cylinder ( $H_1$ ), gyroid (G), lamellar ( $L_\alpha$ ), and crystal (K). Selective (A) POM images and (B) X-ray scattering data represent this sequence.

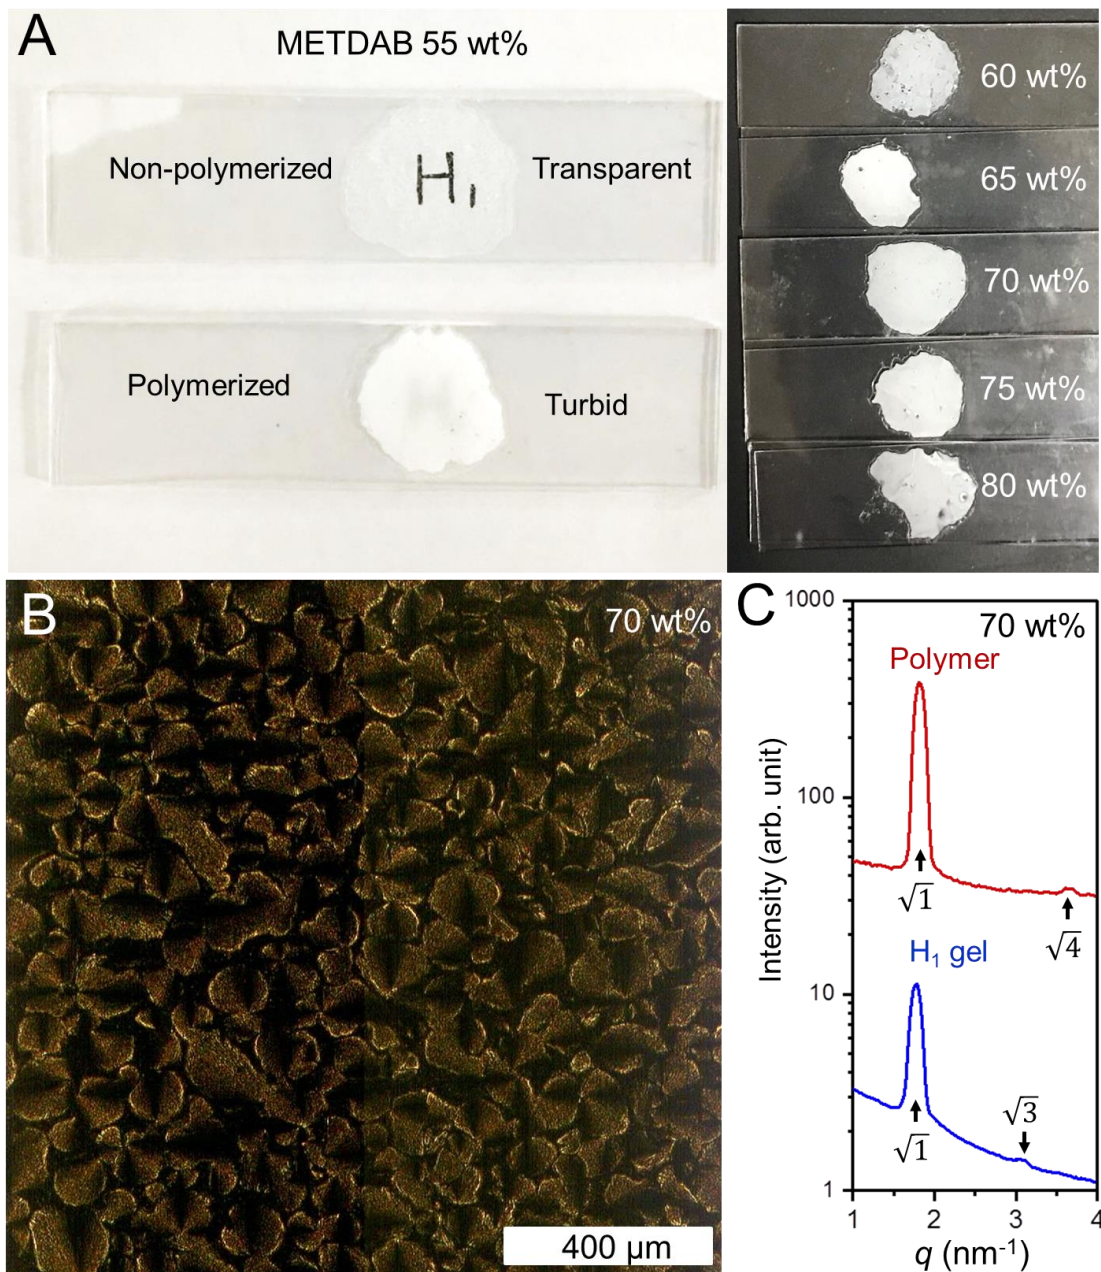

**Fig. S2. Polymerization of H<sub>1</sub> mesophases formed by METDAB/water binary systems in the absence of cross-linkers.** (A) Photos showing remarkable cloudiness in polymerized H<sub>1</sub> samples with different METDAB contents ranging from 55 to 80 wt%. (B) POM image of the polymerized H<sub>1</sub> mesophase with 70 wt% METDAB shows loss of the typical LC texture. (C) 1-D SAXS data displays that the ratio of peak locations changes from 1:  $\sqrt{3}$  to 1:  $\sqrt{4}$  after polymerization, indicative of disruption of the H<sub>1</sub> morphology. Photo credit: Xunda Feng, Yale University.

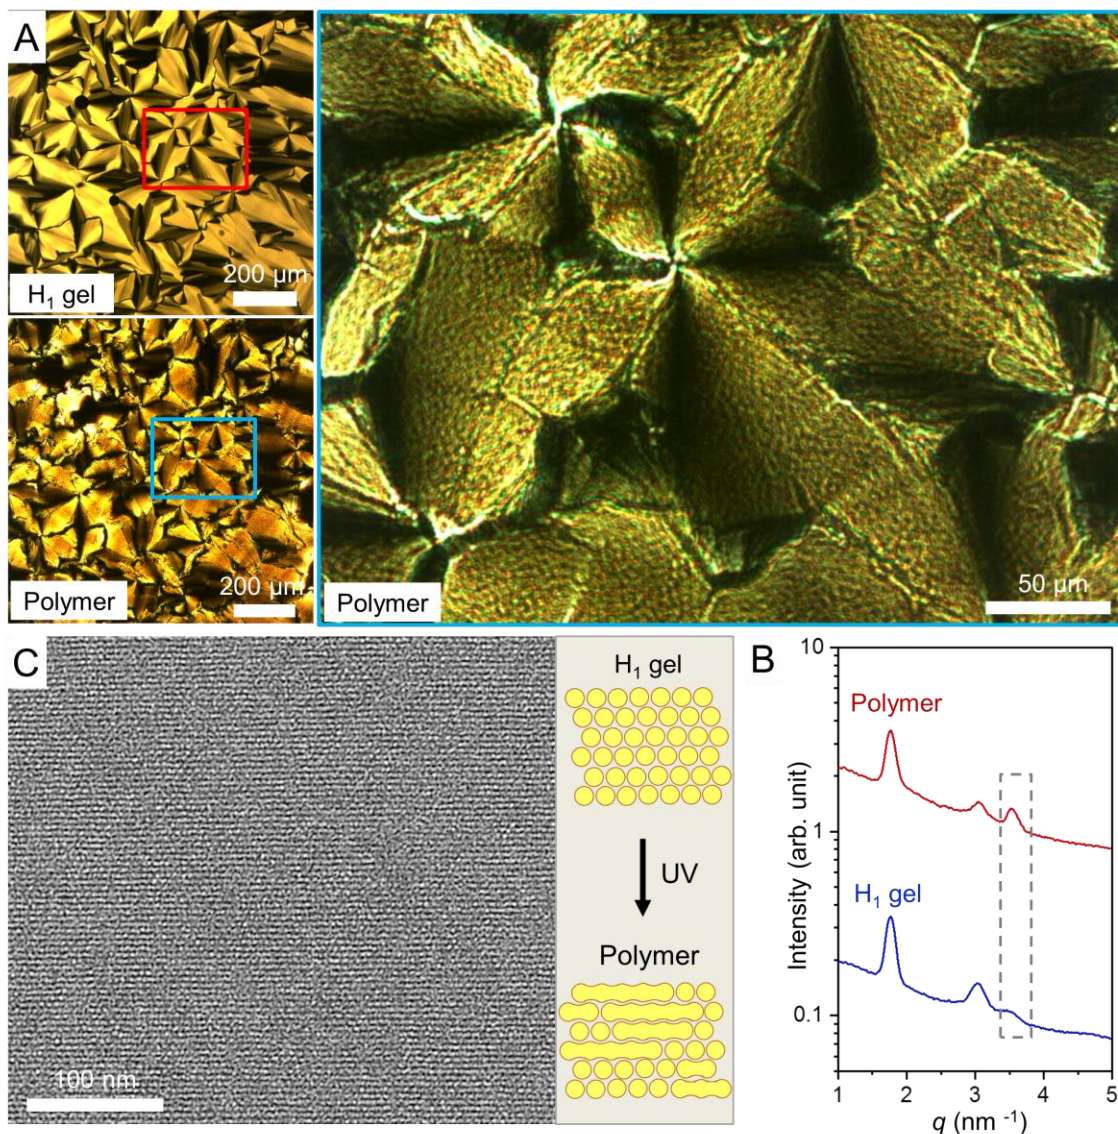

**Fig. S3. Structural characterization of an H<sub>1</sub> mesophase containing only one cross-linking species in the hydrophobic core of cylindrical micelles before and after UV-initiated cross-linking.** The cross-linker is 1,6-hexanediol dimethacrylate (HDMA). The mesophase contained 70 wt% METDAB, 6 wt% HDMA, and 24 wt% water. (A) Characteristic developable domain texture of the H<sub>1</sub> mesophase observed using POM before crosslinking. After UV induced cross-linking, a superficially similar, but discernably different, birefringent texture was observable in low magnification POM images. A magnified view (right) more clearly shows the emergence of optical inhomogeneities within the developable domains, reflecting disruption of the original H<sub>1</sub> morphology. Rectangles highlight the change of the LC texture induced polymerization. (B) X-ray scattering data showing intact peak locations but an unexpected increase of the intensity of the (200) peak after UV-induced cross-linking. (C) TEM image and schematic, illustrate the tendency of the hexagonal cylinders to transform to lamellar structures after cross-linking.

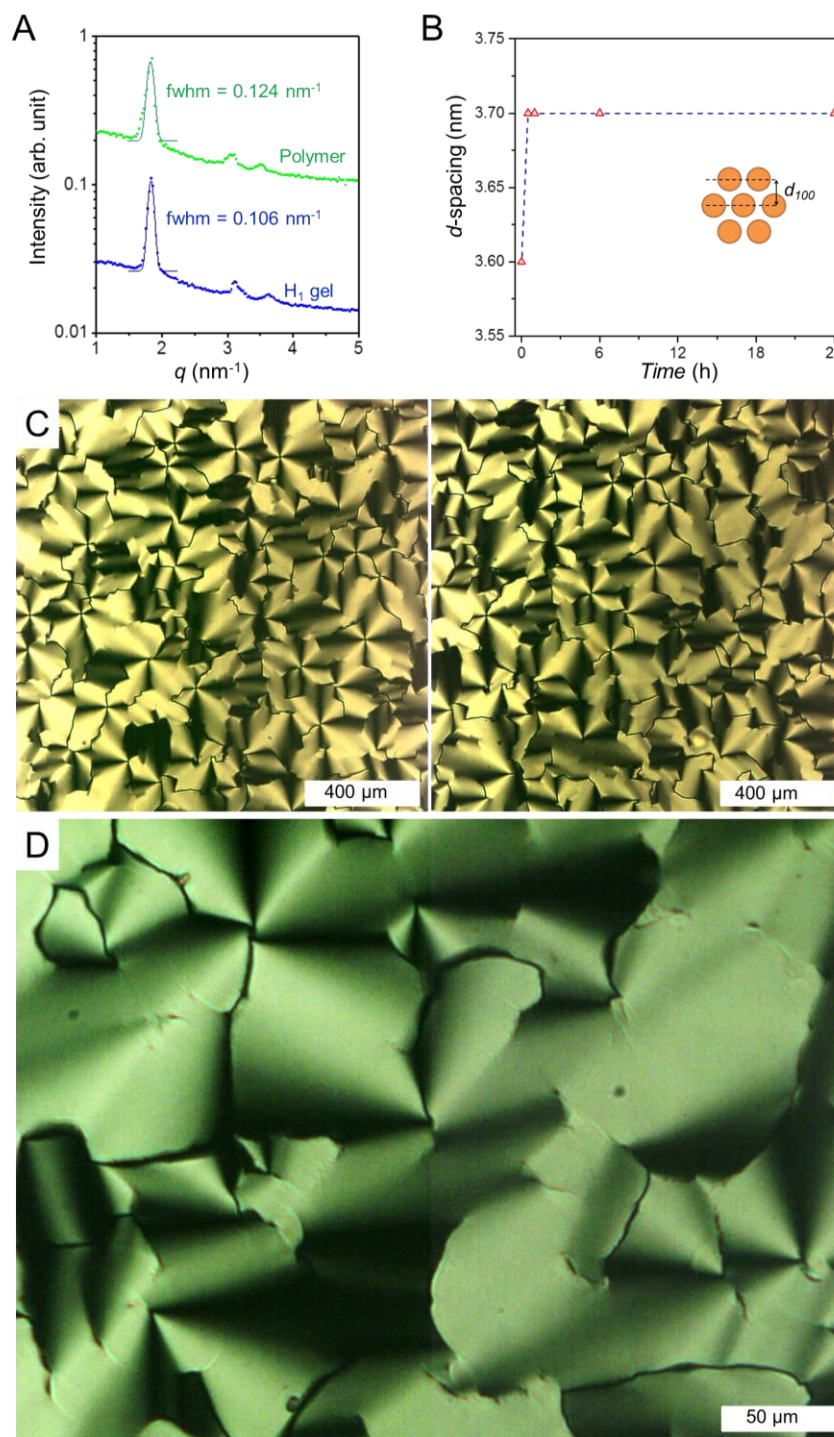

**Fig. S4. X-ray scattering and POM data showing slight structural changes in the  $\text{H}_1$  gel, the cross-linked  $\text{H}_1$  mesophase, and the swelled polymer.** (A) Gaussian fits of the (100) SAXS peaks of the  $\text{H}_1$  gel and the corresponding polymer to obtain the values of full width at half maximum (fwhm). (B) Time dependent  $d_{100}$  spacing of the cross-linked  $\text{H}_1$  membrane immersed in water as determined by X-ray scattering. (C) Low-magnification and (D) High-magnification POM images of the crosslinked  $\text{H}_1$  mesophase.

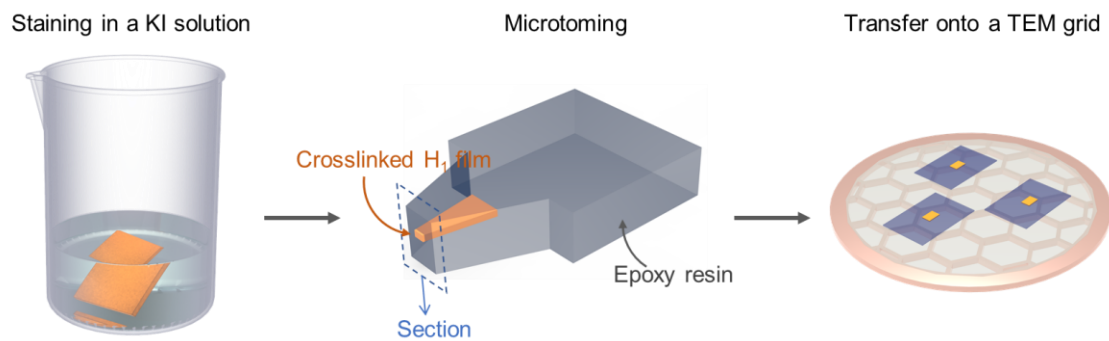

**Fig. S5. Schematic illustration for the preparation of TEM samples.**

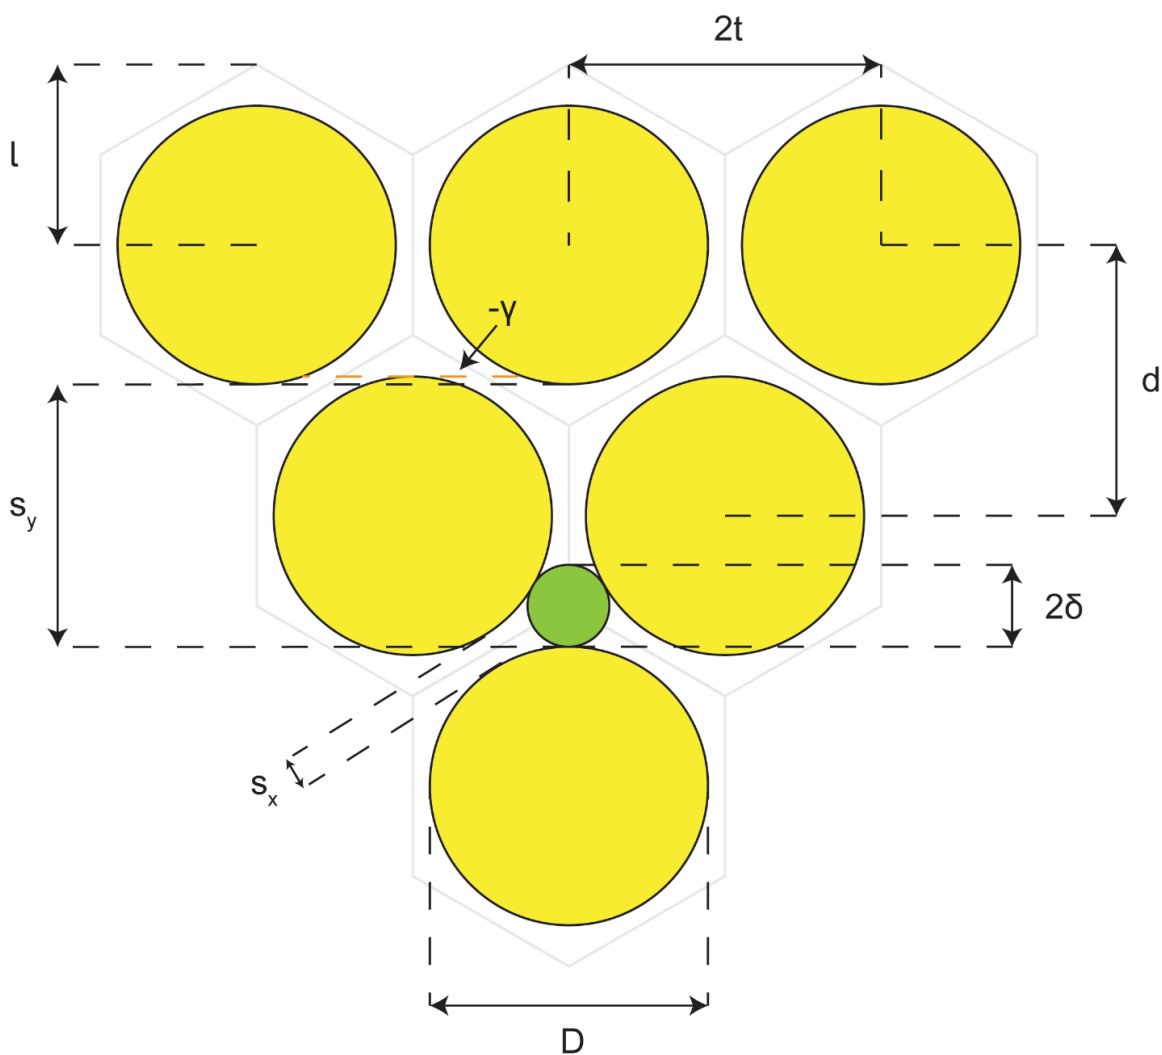

**Fig. S6. Schematic illustration of the pore dimensions.** The controlling dimensions of the structure are  $\sim 1.1$  nm ( $2\delta$ ) for transport in parallel and  $\sim 0.5$  nm ( $s_x$ ) for transport in perpendicular. Calculations are detailed in Section S1.

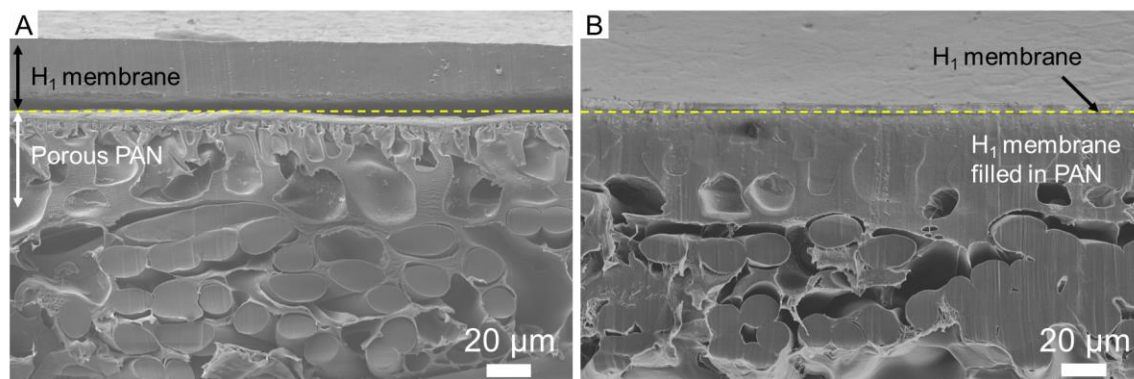

**Fig. S7. SEM images showing the cross sections of the H<sub>1</sub>/PAN composite membranes.** The H<sub>1</sub> gel infiltrates the pores of the PAN support membrane during the pressing stage and the infiltrated H<sub>1</sub> is eventually crosslinked along with the surface H<sub>1</sub> layer.



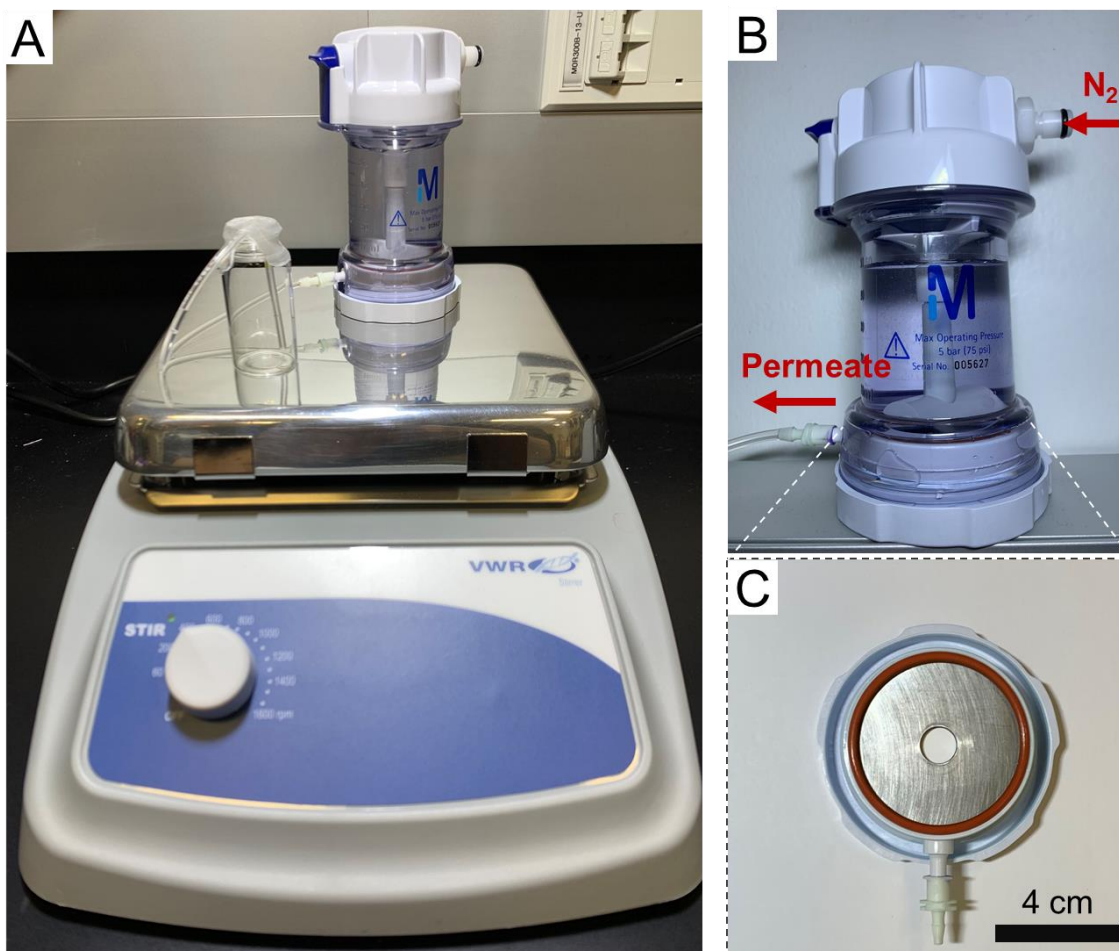

**Fig. S8.** Photos showing the stirred cell used for the nanofiltration test. (A) 50 mL EMD Millipore Amicon (UFSC05001) stirred cell. A stirring speed of 400 rpm was employed. (B) Photo showing the inlet of the compressed N<sub>2</sub> and the outlet of the permeate. (C) The active testing area of the membrane coupon was a circular area with a diameter of 1.1 cm. Photo credit: Yizhou Zhang, University of Pennsylvania.

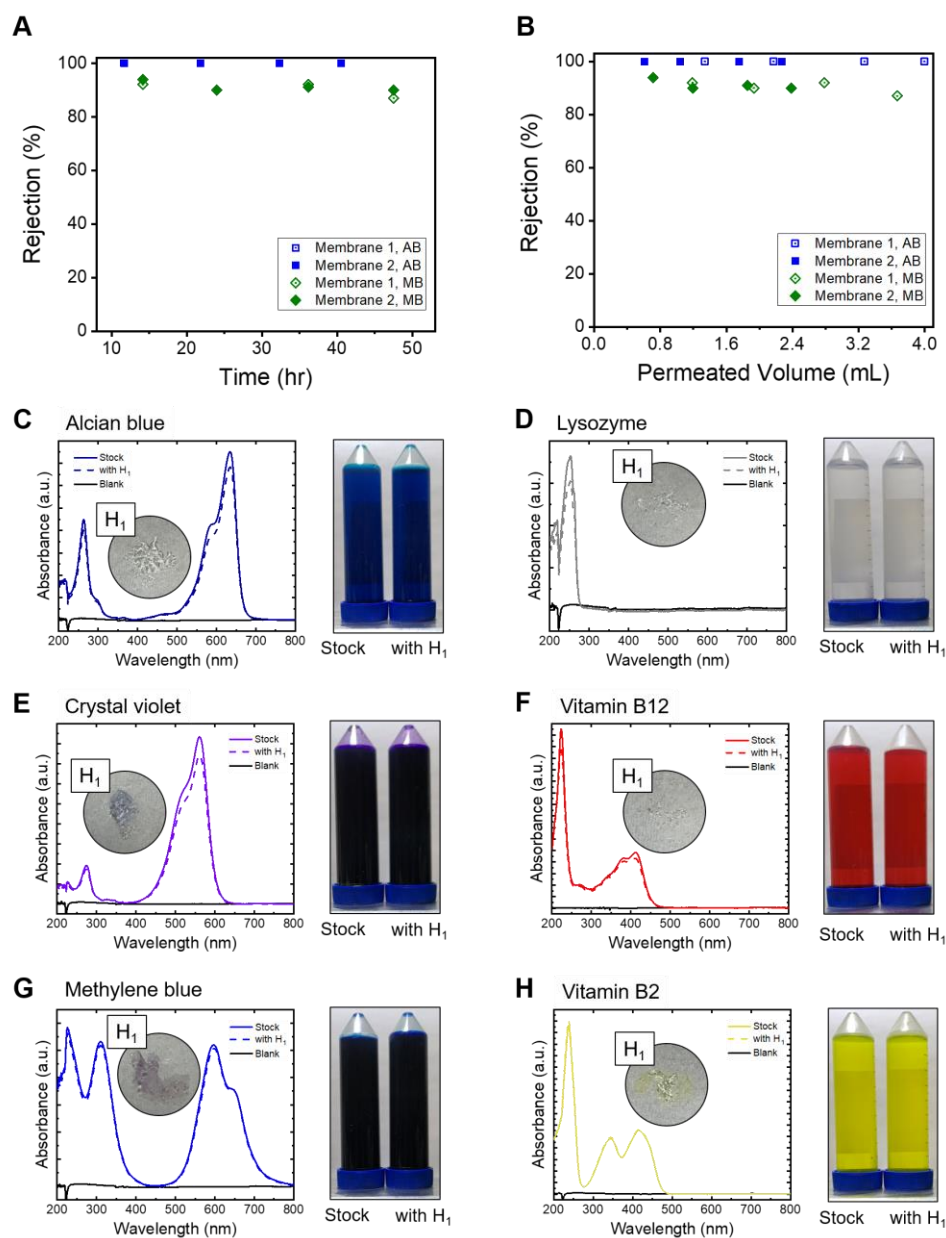

**Fig. S9. The time-dependent solute rejection for  $H_1$  composites and the static solute adsorption experiment for free-standing  $H_1$  membranes.** The time-dependent solute rejection tests suggest the separation performance of  $H_1$  composite is independent of (A) experiment time and (B) permeated solution volume. UV-Vis spectroscopy was employed to determine the possible adsorption of dye molecules by the membranes. Dyes tested were (C) Alcian blue, (D) lysozyme, (E) crystal violet, (F) vitamin B<sub>12</sub>, (G) methylene blue and (H) vitamin B<sub>2</sub>. The experiment was performed with a same initial solute concentration as utilized during single solute rejection experiment, with a packing ratio of  $\sim 0.2$  g membrane per L solution. The membranes did not uptake a significant amount of solute during prolonged soaking, suggesting adsorption did not affect the results in single solute rejection experiments. Photo credit: Yizhou Zhang, University of Pennsylvania.

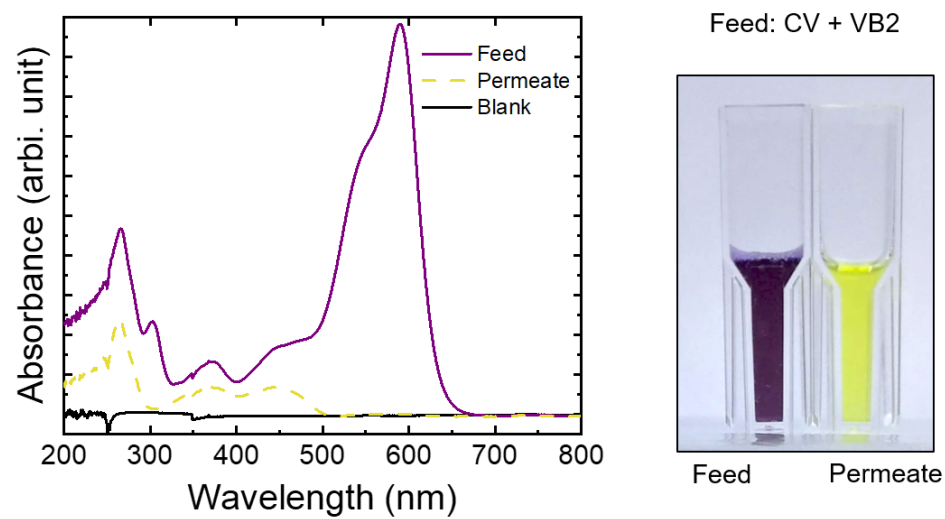

**Fig. S10. UV-Vis spectrum and photographs demonstrating the competitive solute separation of CV and VB2.** The membrane selectively rejects CV while allowing VB2 to partially permeate through ( $R \sim 50\%$ ). Photo credit: Yizhou Zhang, University of Pennsylvania.

## Section S1. Calculation of the pore dimensions in an H<sub>1</sub> membrane

As simply illustrated in fig. S6, the geometry of an H<sub>1</sub> membrane consists of a continuous water transport path and discontinuous cylinders (colored in yellow). The volume fractions of the cylinders  $\phi$  and the water transport path  $1-\phi$  are assumed to be 0.72 and 0.28, respectively, on the basis of the original composition of the H<sub>1</sub> gel. The distance of the neighboring (100) planes  $d$  was determined by X-ray scattering to be 3.6 nm.

$$l = \frac{2d}{3}$$

$$\delta = l - \frac{D}{2}$$

$$t = \sin\left(\frac{\pi}{3}\right)l$$

$$2\delta = d \left[ \frac{4}{3} - \left( \frac{8\phi}{\sqrt{3}\pi} \right)^{\frac{1}{2}} \right] = 1.09 \text{ nm}$$

$$S_x = 2t - D = d \left[ \sqrt{\frac{4}{3}} - \left( \frac{8\phi}{\sqrt{3}\pi} \right)^{\frac{1}{2}} \right] = 0.45 \text{ nm}$$

$$S_y = 3l - D = d \left[ 2 - \left( \frac{8\phi}{\sqrt{3}\pi} \right)^{\frac{1}{2}} \right] = 3.5 \text{ nm}$$

$$\gamma = \frac{3l}{2} - D = d \left[ 1 - \left( \frac{8\phi}{\sqrt{3}\pi} \right)^{\frac{1}{2}} \right] = -0.10 \text{ nm}$$
